# Supplementary material
Source: HighWire-hosted journal article supplement (https://bmjopen.bmj.com/content/8/7/e024616)
Supplement: inline-supplementary-material-1 [file inline-supplementary-material-1.pdf]

**Research Funded by  
Yorkshire Cancer  
Research**

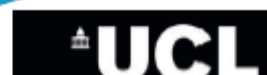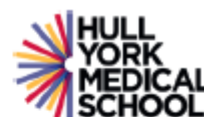

## Have you recently turned 55 or are you about to?

If so, you will soon be invited for bowel scope screening.

Bowel scope screening is a test offered by the NHS Bowel Cancer Screening Programme to 55 year olds in many areas across England.

The test can help reduce a person's risk of getting bowel cancer.

This GP practice is taking part in a study led by researchers at **University College London** and **Hull York Medical School**.

The study aims to find out if GP practices in Yorkshire have a role to play in helping their patients make a decision about bowel scope screening.

If you are registered at this practice, you may be selected at random to receive additional letters, a leaflet, and/or a phone call from us about your bowel scope screening invitation as part of this study.

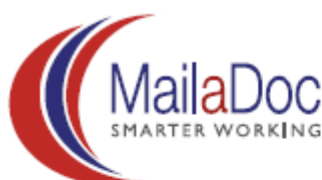

MailaDoc is the company that will print and send out the letters and leaflets on our behalf. For this to happen, we will securely pass your name and address to MailaDoc. Public Health England have approved their use in this study.

**To learn more about this study**, read the leaflet available at reception or go to: <https://goo.gl/6crDPi>

**To learn about how your data is used in research**, visit the NHS Health Research Authority website: <https://www.hra.nhs.uk/information-about-patients/>

**OPT OUT** Please let reception staff know if you **DO NOT** want to be part of this study.

You will still receive your bowel scope screening invitation.

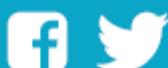

[www.ycr.org.uk](http://www.ycr.org.uk)

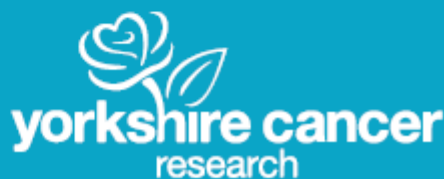

Version 1.1: 20.06.2018  
IRAS number 225268

Registered Charity 516898
